# Supplementary material for: Gene clustering and copy number variation in alkaloid metabolic pathways of opium poppy
Source: Nat Commun. 2020 Mar 4;11:1190. doi: 10.1038/s41467-020-15040-2 (PMC7055283; doi:10.1038/s41467-020-15040-2)
Supplement: Supplementary file 1 — Supplementary Information [file 41467_2020_15040_MOESM1_ESM.pdf]

**Gene clustering and copy number variation in alkaloid metabolic  
pathways of opium poppy**

Li *et al.*

### **Supplementary Method 1. PacBio raw reads mapping**

PacBio raw reads (SRR7668135 - SRR7668143) of HN1 (SAMN08604995) were downloaded from the NCBI-SRA. For PS7 in this study, PacBio RSII sequencing of long insert-size libraries was carried out on 58 SMRT cells. After filtering out the reads shorter than 1kb, 31.6 Gb PacBio reads for HN1 (read-length up to 98.3 kb, reads N50 of 12.1 kb) and 30.1 Gb PacBio reads for PS7 (read-length up to 67.1 kb, reads N50 of 10.7 kb) were used in the mapping to the joins using minimap2<sup>1</sup>, with present option “map-pb” optimized for the long noisy reads alignment.

### **Supplementary Method 2. Coordinate transformation of protein-coding genes**

The protein-coding genes annotation of the Poppy genome reported by Guo *et al.*<sup>2</sup> was transformed to the Hi-C improved genome assembly following the GEAN<sup>3</sup> pipeline of “Lift over reference genome annotation to a *de novo* assembly genome using CDS sequence mapping” in the manual. Splice-aware model of minimap2<sup>1</sup> was used for aligning the primary transcript CDS sequence to the new genome assembly.

### **Supplementary Method 3. Gene expression**

PCA analysis of normalised gene expression counts from 100,709 genes from all the 13 samples grouped the two early developmental stages, S1 and S2, together (Supplementary Fig. 17). The mid to late developmental stages (S3-S7) grouped together with PC1 separating the stages according to increasing developmental maturity. The mature capsule and the latex samples exhibit very similar gene expression patterns, as expected, while the root is distinct from all the other samples. Similarities in gene expression of the 109 annotated BIA pathway genes from the 13 above-mentioned RNAseq samples was studied using unsupervised hierarchical clustering of the gene expression counts (Supplementary Fig. 6). The genes were divided by expression

patterns into two major groups with several sub-groups: (1) (a) genes involved in reticuline, noscapine, and thebaine synthesis which were expressed at moderate to high levels ( $3 < \log_{10}[\text{exp}] < 6$ ) across most samples and (b) genes involved in the morphine and unknown (MLP/PR10) pathways that were highly expressed in the latex sample ( $\log_{10}[\text{exp}] > 6$ ); (2) (a) genes involved in sanguinarine expressed almost exclusively in the roots, with little expression in the stems (b) genes involved in dopamine synthesis were expressed in the later developmental stages (Supplementary Fig. 3-7) as well as the root and stem and (c) the remaining subclusters were a papavarine, thebaine and morphine genes that were highly expressed in the latex sample. Interestingly, several of the MLP and PR10 genes in unknown pathways clustered tightly with genes involved in morphine and thebaine production, further implicating their role in morphine biosynthesis and presenting potential candidates for functional studies.

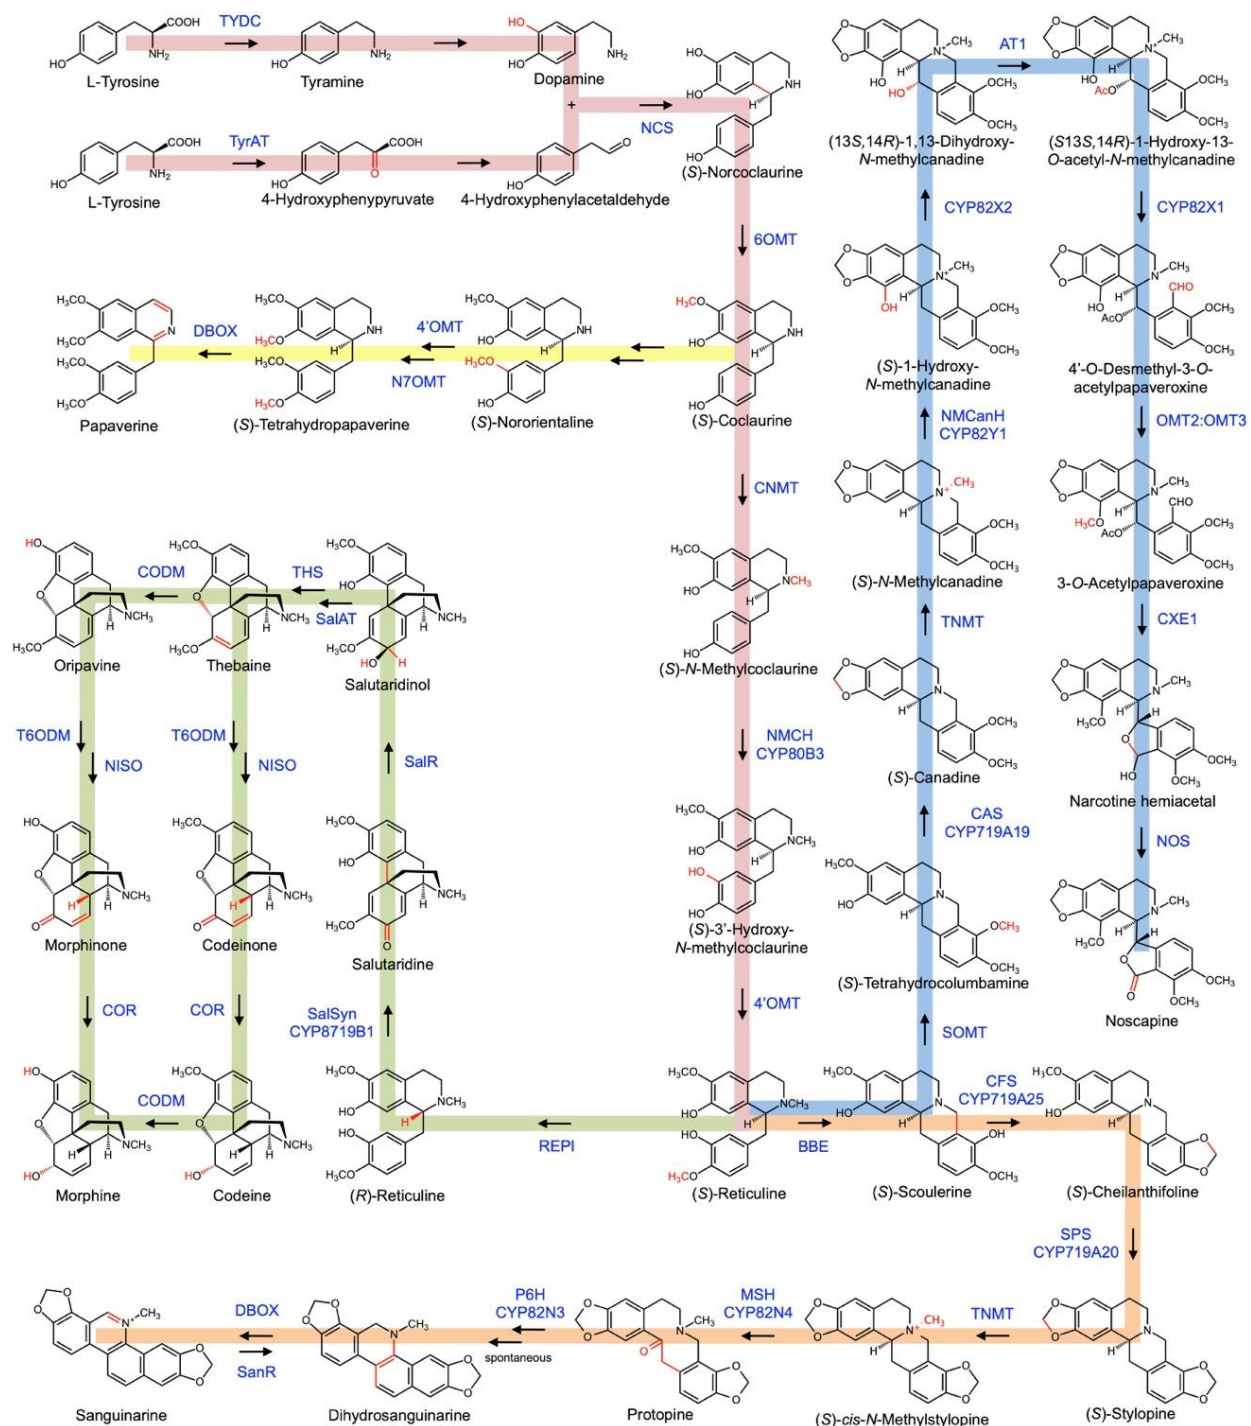

**Supplementary Figure 1. Biosynthetic pathways leading to major benzylisoquinoline alkaloids accumulating in opium poppy.** Pathways: *pink* 1-benzylisoquinoline "core" pathway; *green*, thebaine (promorphinan) and morphinan; *yellow*, papaverine; *blue*, noscapine (phthalideisoquinoline); *orange*, sanguinarine (benzo[c]phenanthridine). Enzymes for which corresponding genes have been isolated from opium poppy are shown in *blue*. Chemical conversions catalyzed by each enzyme are shown in *red*. TYDC tyrosine/DOPA decarboxylase, TyrAT tyrosine

aminotransferase, *NCS* norcoclaurine synthase, *6OMT* norcoclaurine 6-O-methyltransferase, *CNMT* coclaurine *N*-methyltransferase, *NMCH* *N*-methylcoclaurine 3'-hydroxylase (CYP80B3), *4'OMT2* 3'-hydroxyl-*N*-methylcoclaurine 4'-O-methyltransferase (isoform 2), *BBE* berberine bridge enzyme, *SOMT1* scoulerine 9-O-methyltransferase, *CAS* canadine synthase (CYP719A19), *TNMT* tetrahydroprotoberberine *N*-methyltransferase, *NMCanH* *N*-methylcanadine 1-hydroxylase (CYP82Y1), *AT1* acetyltransferase 1, *OMT2:OMT3* 4'-O-desmethyl-3-O-acetylpapaveroxine O-methyltransferase heterodimer; *CXE1* carboxylesterase 1, *NOS* noscapine synthase, *CFS* cheilanthifoline synthase (CYP719A25), *SPS* stylophine synthase (CYP719A20), *MSH* *N*-methylstylophine 14-hydroxylase (CYP82N4), *P6H* protopine 6-hydroxylase (CYP82N3), *DBOX* dihydrosanguinarine oxidase, *SanR* sanguinarine reductase, *REPI* reticuline epimerase, *SalSyn* salutaridine synthase (CYP719B1), *SalR* salutaridine reductase, *SalAT* salutaridinol 7-O-acetyltransferase, *THS* thebaine synthase, *T6ODM* thebaine 6-O-demethylase, *NISO* neopinone isomerase, *COR* codeinone reductase, *CODM* codeine O-demethylase, *N7OMT* norreticuline 7-O-methyltransferase, *3'OHase* uncharacterized 3'-hydroxylase, *3'OMT* uncharacterized 3'-O-methyltransferase.

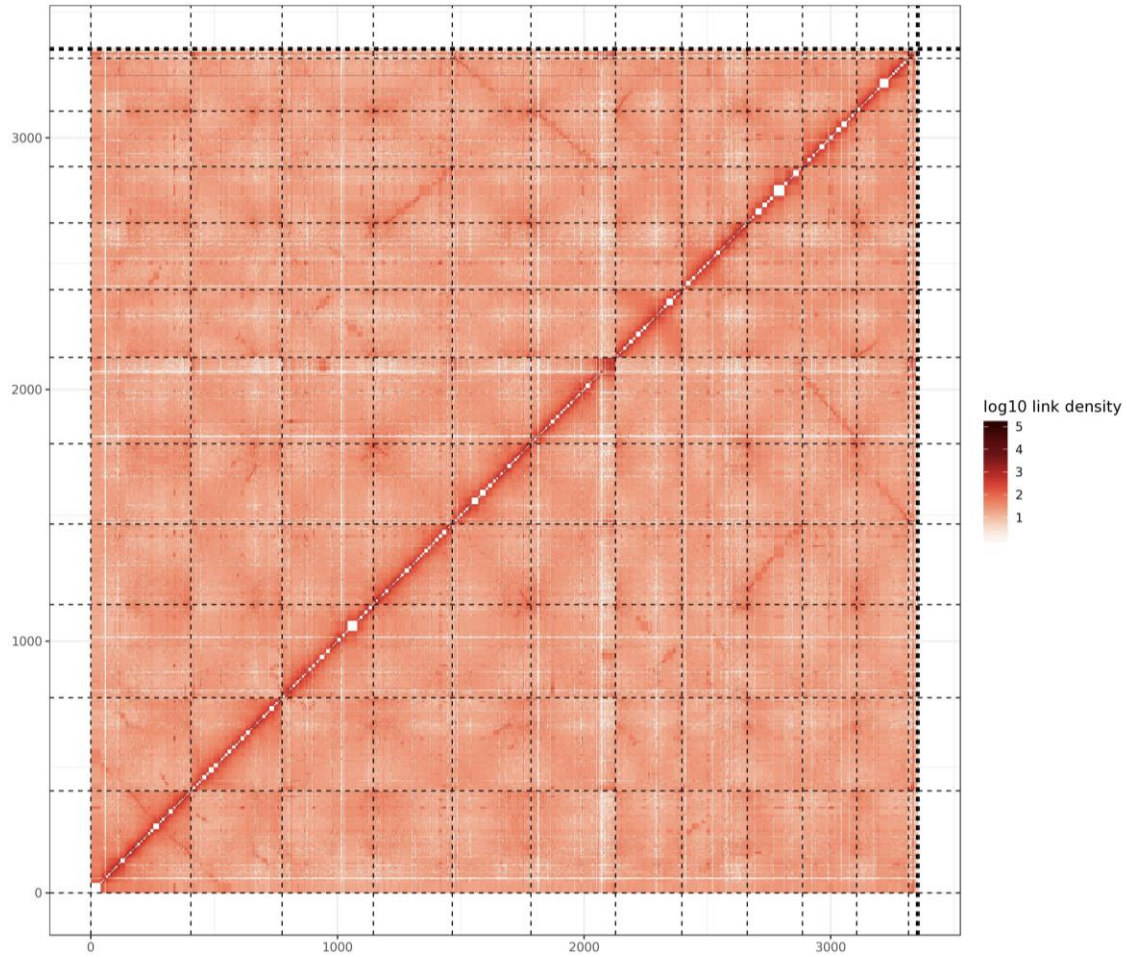

**Supplementary Figure 2. Post-scaffolding Hi-C contact heatmap.** Each x/y coordinate corresponds to 922,623bp of sequence, with the log10 of the Hi-C linkage density between regions indicated by an (x, y) coordinate pair displayed in red. Signal within contigs is masked to emphasize the Hi-C signal used to generate the scaffolds. Dashed lines indicate the boundaries between scaffolds. Three very short scaffolds (<1 Mb each) are visually compressed at the end of the figure, but are distinct in the underlying assembly.



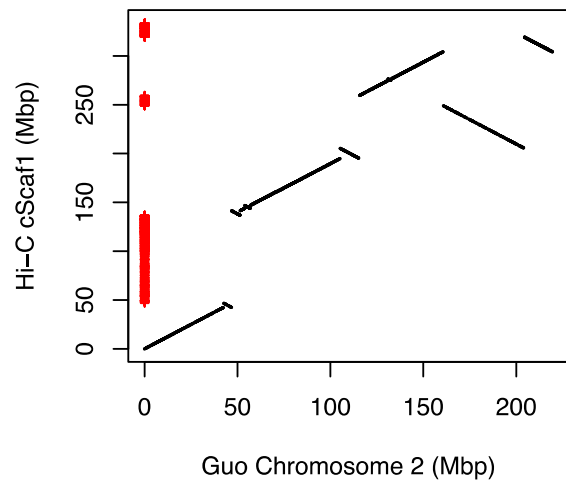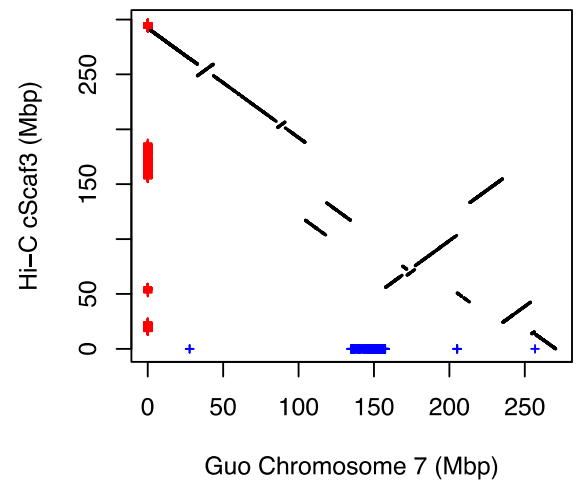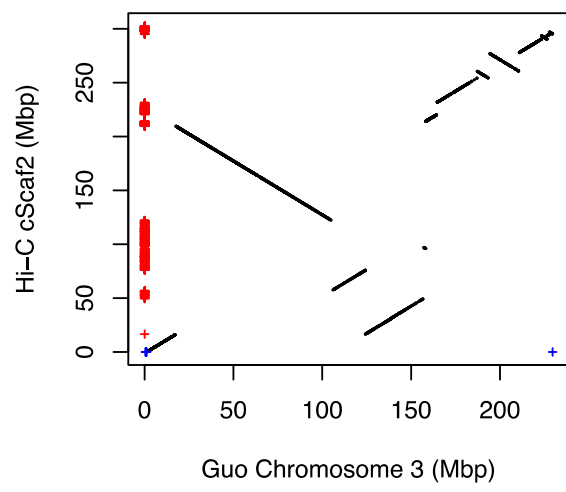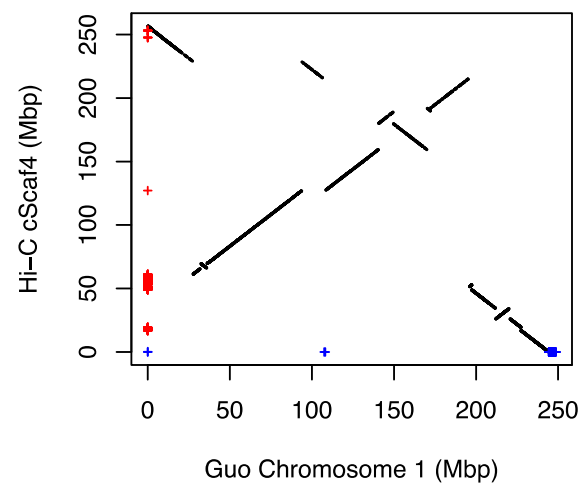

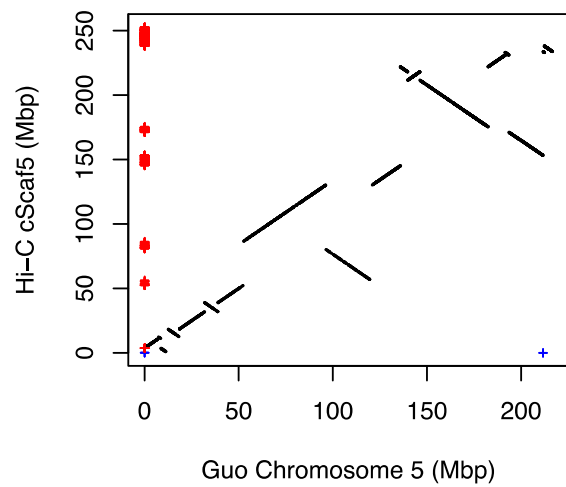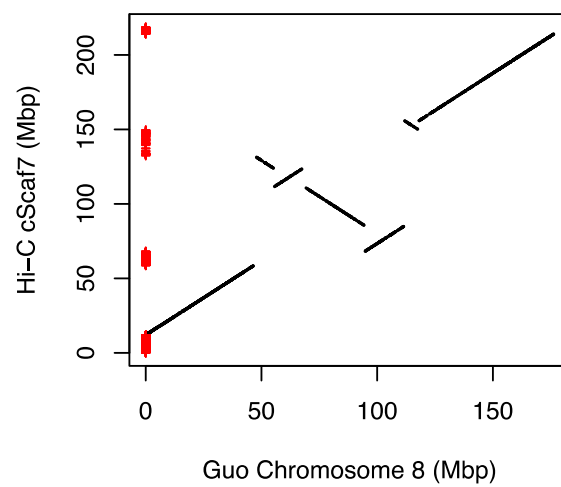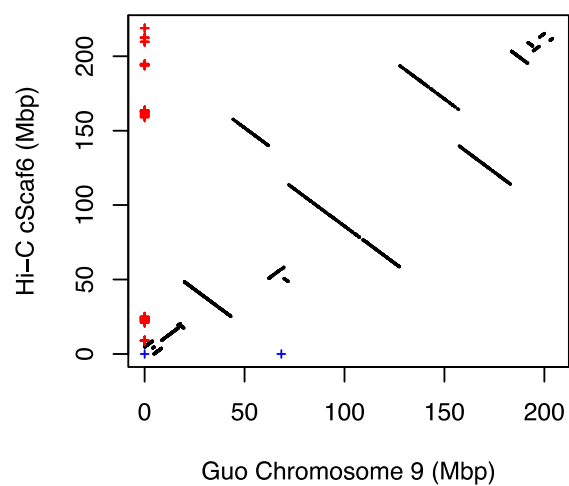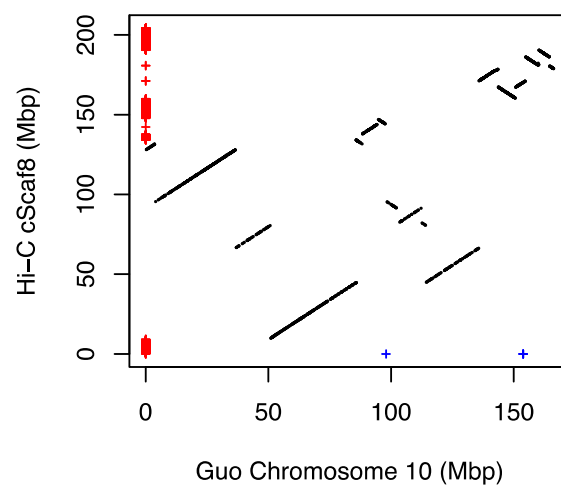

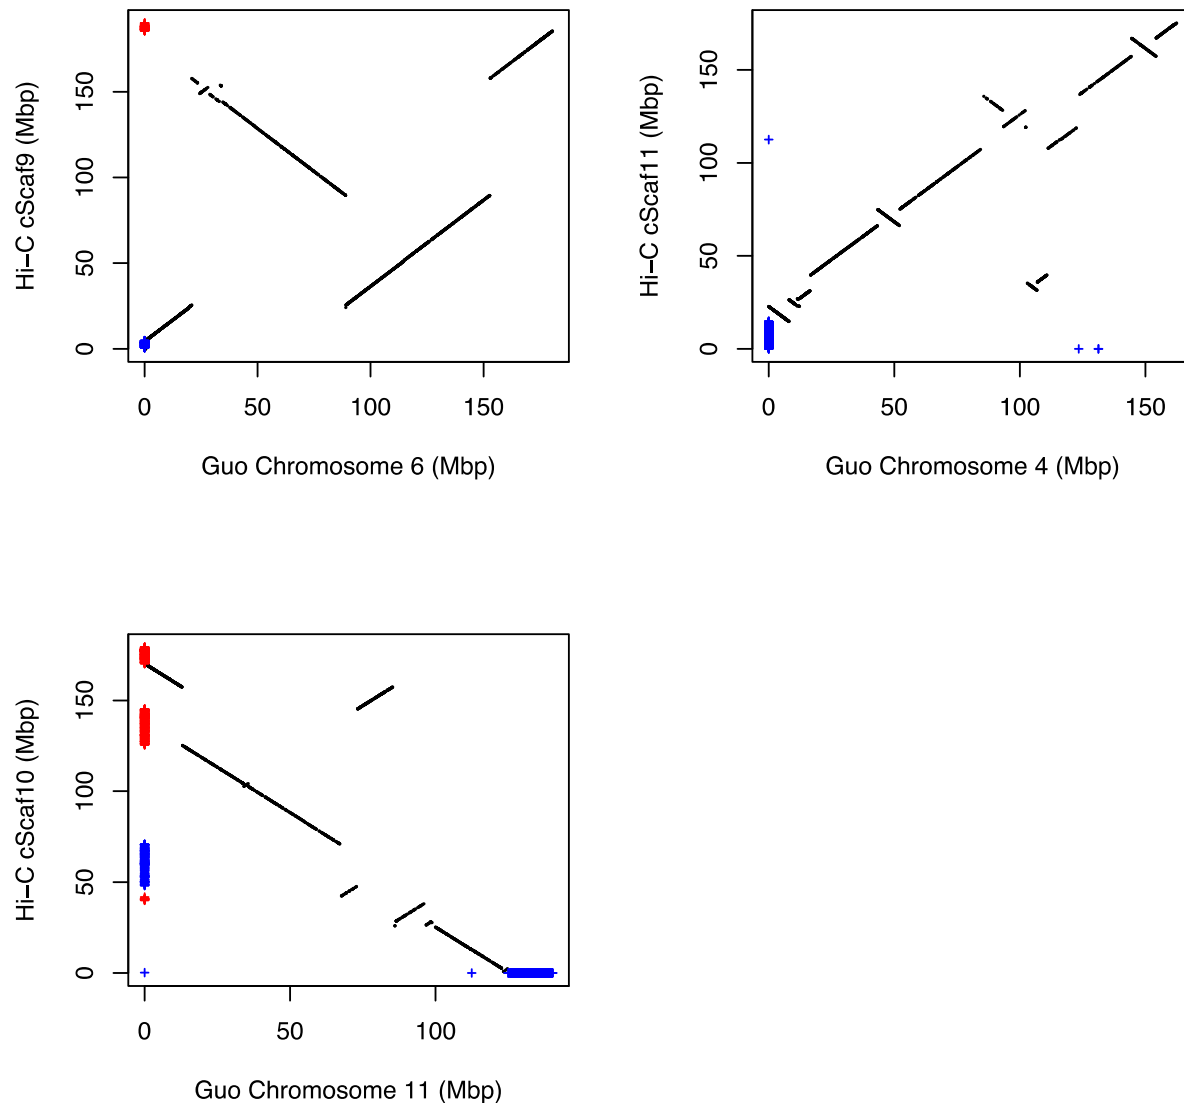

**Supplementary Figure 4. Correspondence between the Guo *et al.*<sup>2</sup> assembly and the Hi-C assembly constructed here.** Each dot represents a case where a given gene mapped to both genomes with 99% identity and 99% coverage. Black indicates cases where the gene was on the same chromosome-scale scaffold in each assembly, red indicates cases where genes were on an unscaffolded contig in the Guo assembly, but were scaffolded in the Hi-C assembly, and blue indicates cases where the gene was scaffolded in both assemblies but on different chromosome-scale scaffolds. Relationship between cScaffs and *P. somniferum* chromosomes as defined by Guo *et al.*<sup>2</sup> is shown in Supplementary Table 12. Source data are provided as a Source Data file.

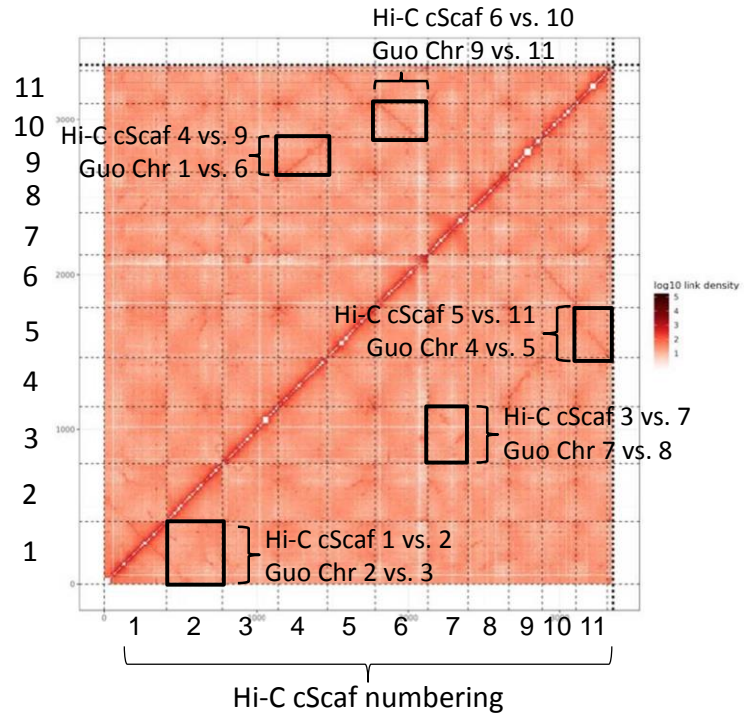

**Supplementary Figure 5. Signals consistent with whole genome duplication in Hi-C data.** Off diagonal correspondence is evident between some chromosomes, which correspond to the pairs of chromosomes that were identified by Guo *et al.*<sup>2</sup> as having been derived from an ancestral chromosome that underwent a whole-genome duplication, as per their Supplementary Fig. 11. Relationship between cScaffs and *P. somniferum* chromosomes as defined by Guo *et al.*<sup>2</sup> is shown in Supplementary Table 12.

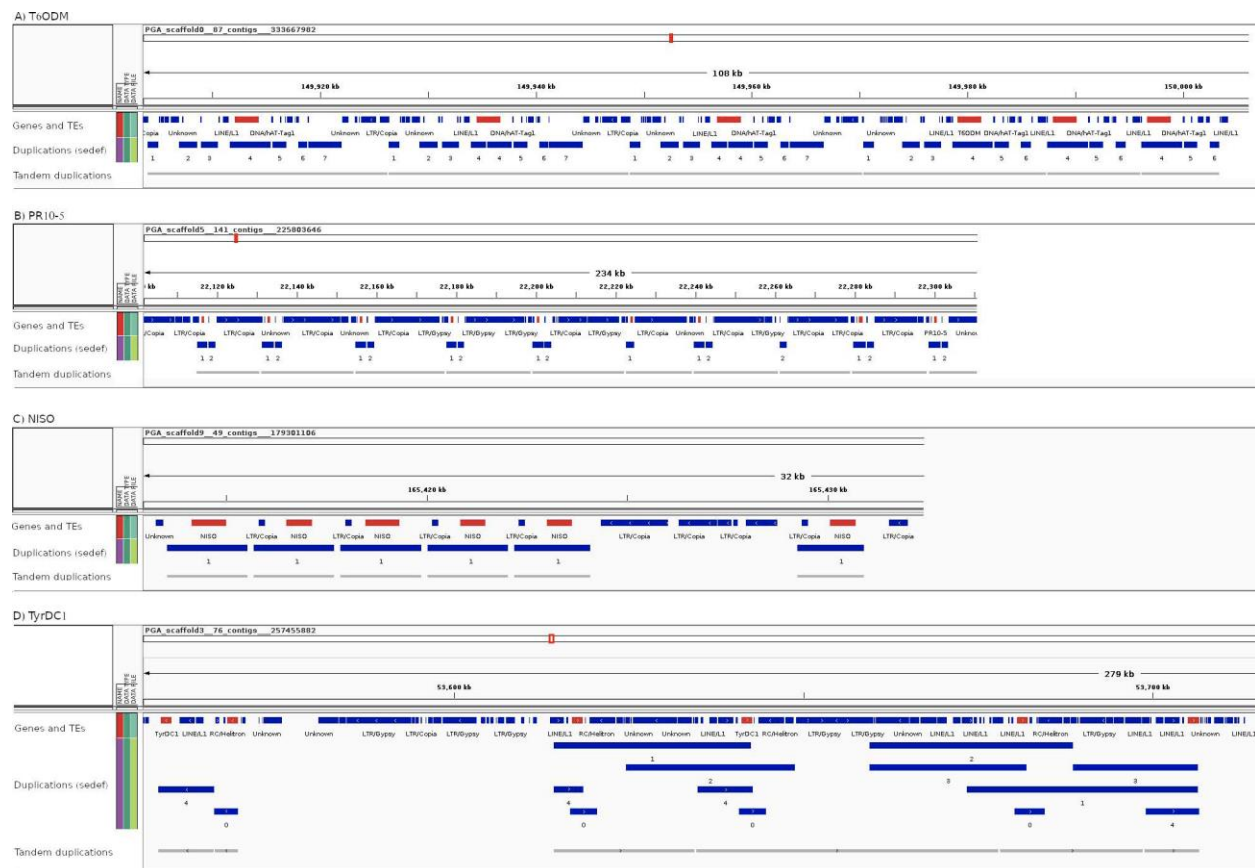

**Supplementary Figure 6. Repetitive regions containing major BIA pathway genes.** Tandem duplications are shown for A) T6ODM, B) PR10-5, C) NISO and D) TyrDC1. Red: Genes, blue: TEs and duplication annotation results from SEDEF, grey: putative complete direct duplications.

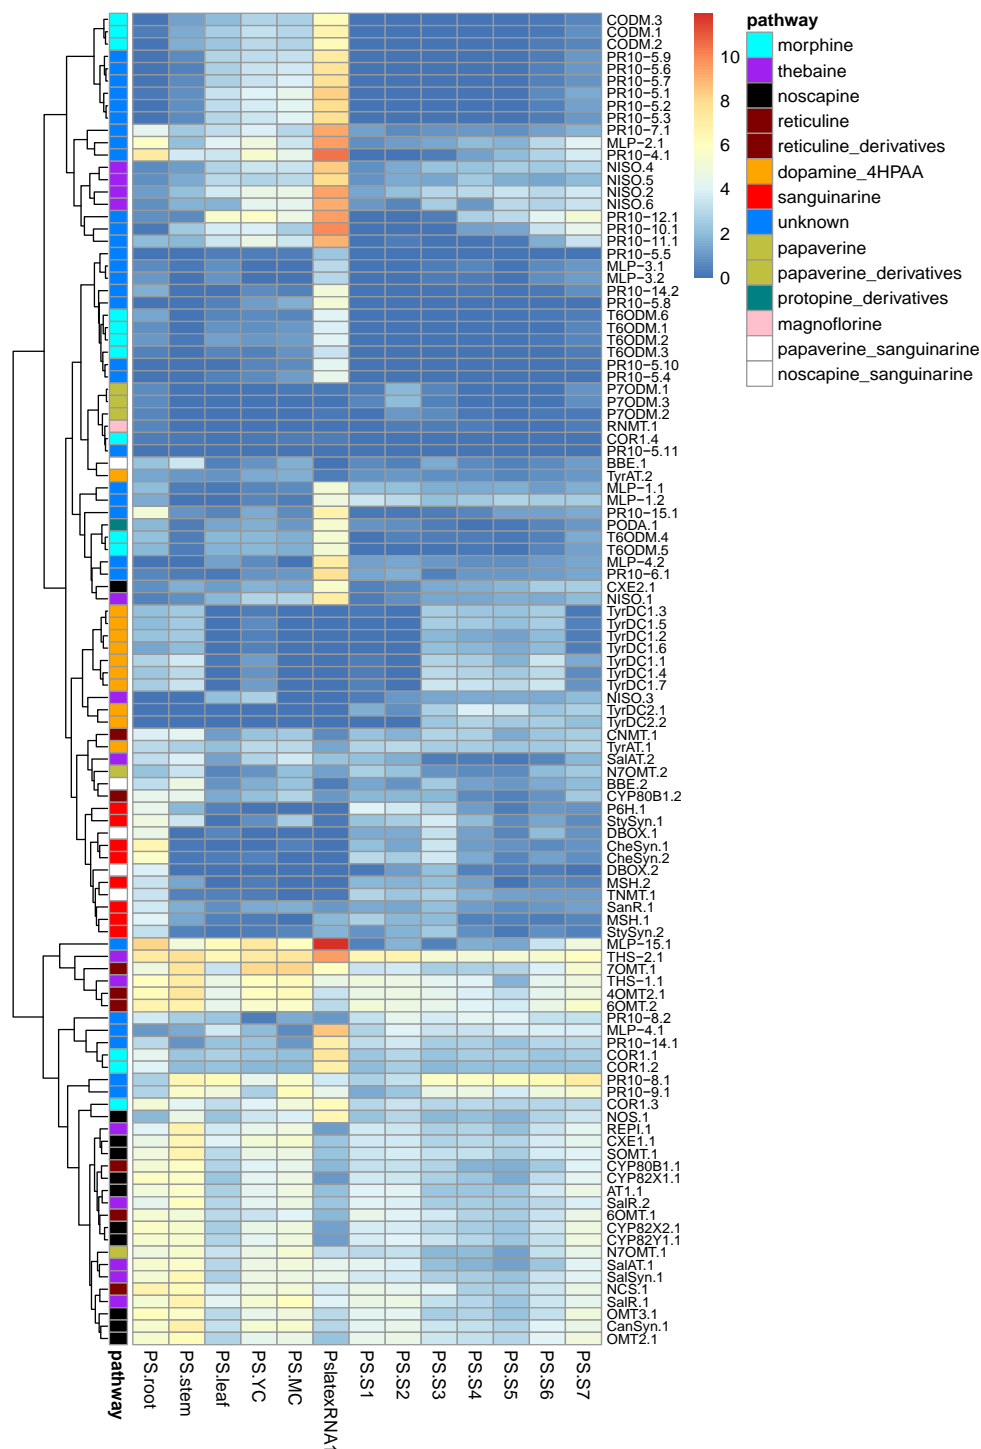

**Supplementary Figure 7. Heatmap of gene expression of BIA pathway genes across six tissues and seven developmental stages.** The heatmap colours range from 0 (blue) to 12 (red) of  $\log_{10}[\text{gene expression}]$ . Source data are provided as a Source Data file.



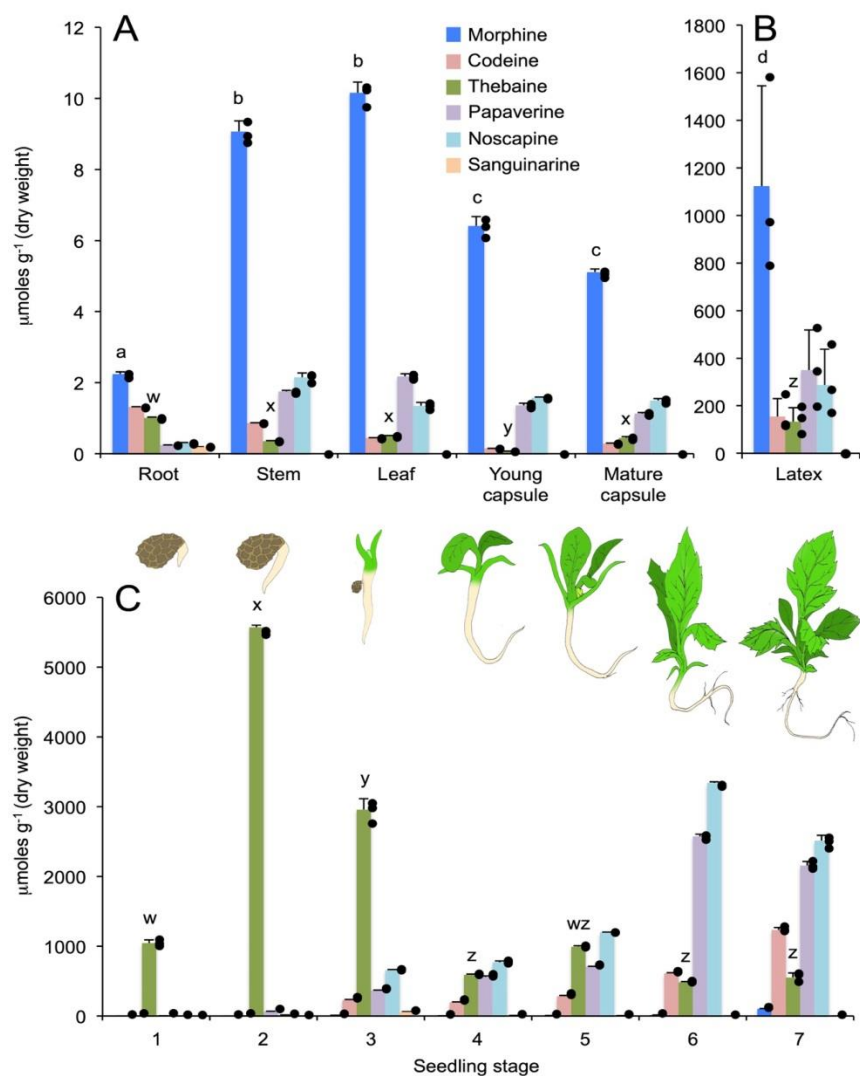

**Supplementary Figure 9. Alkaloid quantities per dry weight of various plant components.** (A-B) Content of six major alkaloids in various organs and in the latex of opium poppy. For plant organs (A) and latex (B), n=3 biologically independent samples were analyzed over two independent experiments producing similar results (only one experiment is included in the plot). Latex alkaloid content is shown separately owing to the substantial difference in y-axis scale compared to organs. (C) Profiles of six alkaloids in seven consecutive developmental stages of opium poppy seedlings. Seedling stages are numbered 1-7 on x-axis, with schematic diagrams shown above each stage. For seedlings, n=3 biologically independent samples were analyzed over two independent experiments producing similar results (only one experiment is included in the plot). In all cases, bars represent mean values +/- standard deviation, and individual data points are plotted to the right of each corresponding bar. Different letters above bars indicate significant differences ( $P < 0.5$ ) as determined using an unpaired, two tailed Student t-test. For clarity, statistical analyses are shown only for morphine (letters a-d) and thebaine (letters w-z). Illustrations by Jill Hagel. Source data are provided as a Source Data file.

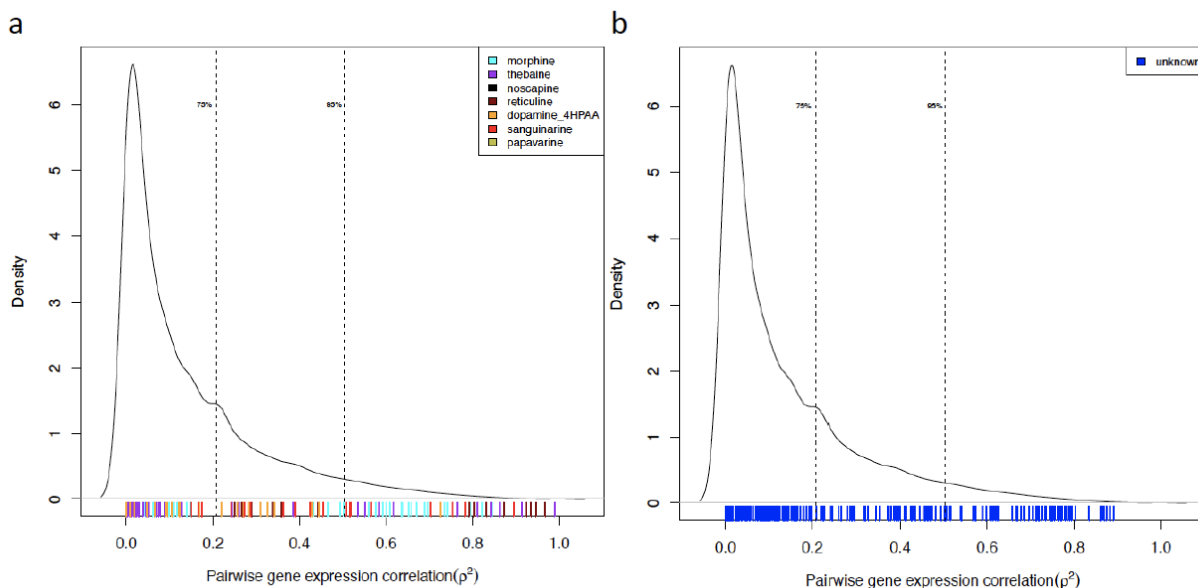

**Supplementary Figure 10. Gene expression correlation of unlinked genes in the opium poppy transcriptome.** (A) Density of correlation between unlinked non-BIA genes compared to unlinked genes in known BIA pathways and (B) genes in unknown pathways. Source data are provided as a Source Data file.

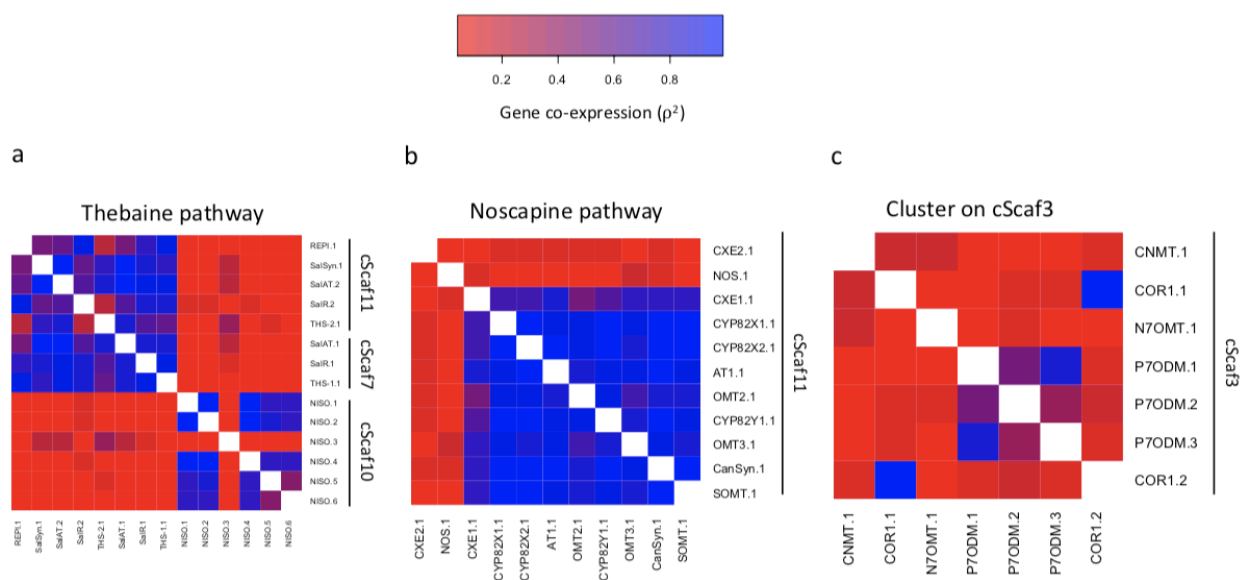

**Supplementary Figure 11. Co-expression among the genes in the thebaine and noscapine pathways and in the cluster of BIA genes on cScaf 3.** BIA genes shown for the thebaine (A) and noscapine (B) pathways, and a cluster of genes on cScaf3 (C). Shading of each cell represents the Spearman's correlation between TPM expression counts across the six tissues and seven developmental stages. Relationship between cScafs and *P. somniferum* chromosomes as defined by Guo *et al.*<sup>2</sup> is shown in Supplementary Table 12. Source data are provided as a Source Data file.

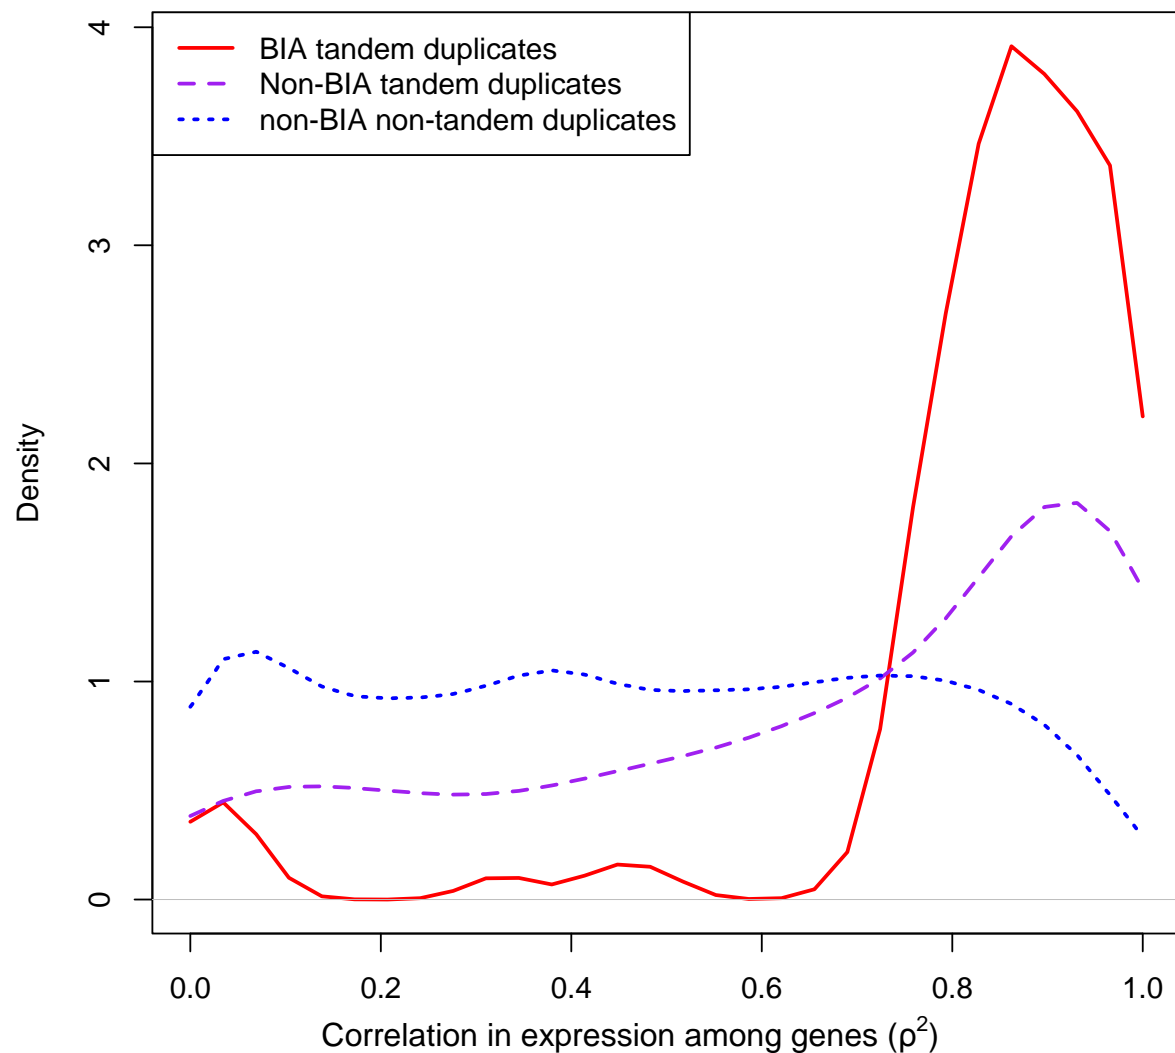

**Supplementary Figure 12. Patterns of co-expression among BIA and non-BIA tandem duplicates.** For comparison, values are also shown for co-expression for duplicated genes localized in different regions of the genome (either >500 kb or on different chromosomes). Co-expression is measured as Spearman's correlation between TPM expression counts across the six tissues and seven developmental stages. Source data are provided as a Source Data file.

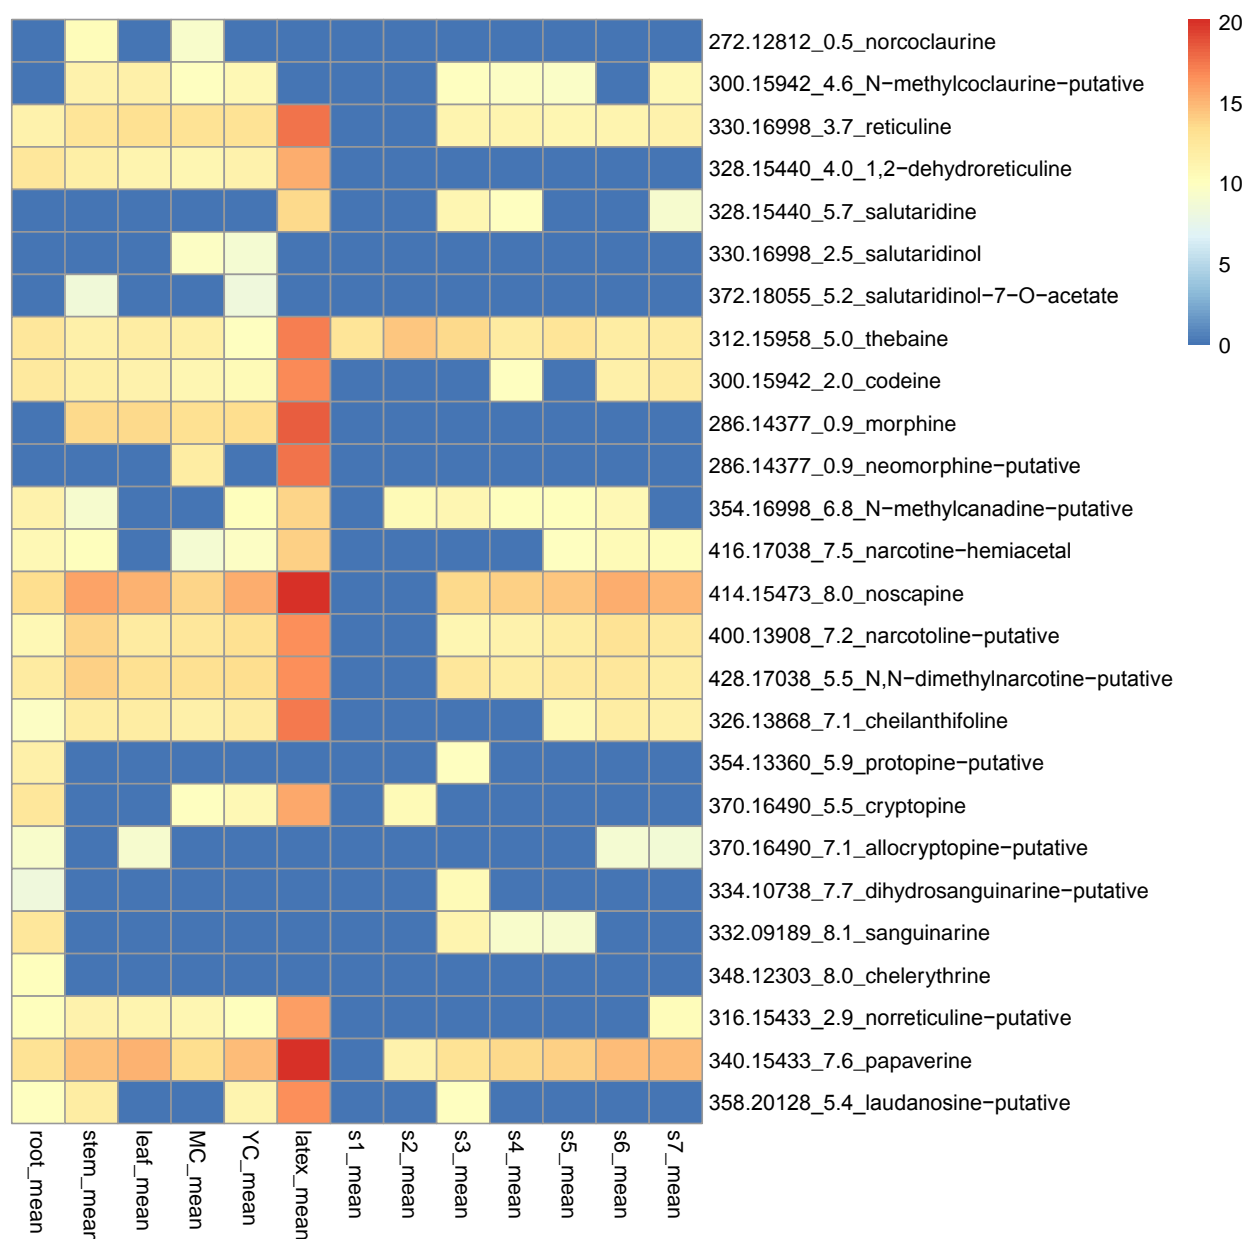

**Supplementary Figure 13. Heatmap of known alkaloid abundances from six tissues and seven developmental stages quantified from Orbitrap analysis.** The heatmap colours range from 0 (blue) to 20 (red) of  $\log_{10}[\text{alkaloid content}]$ . Source data are provided as a Source Data file.

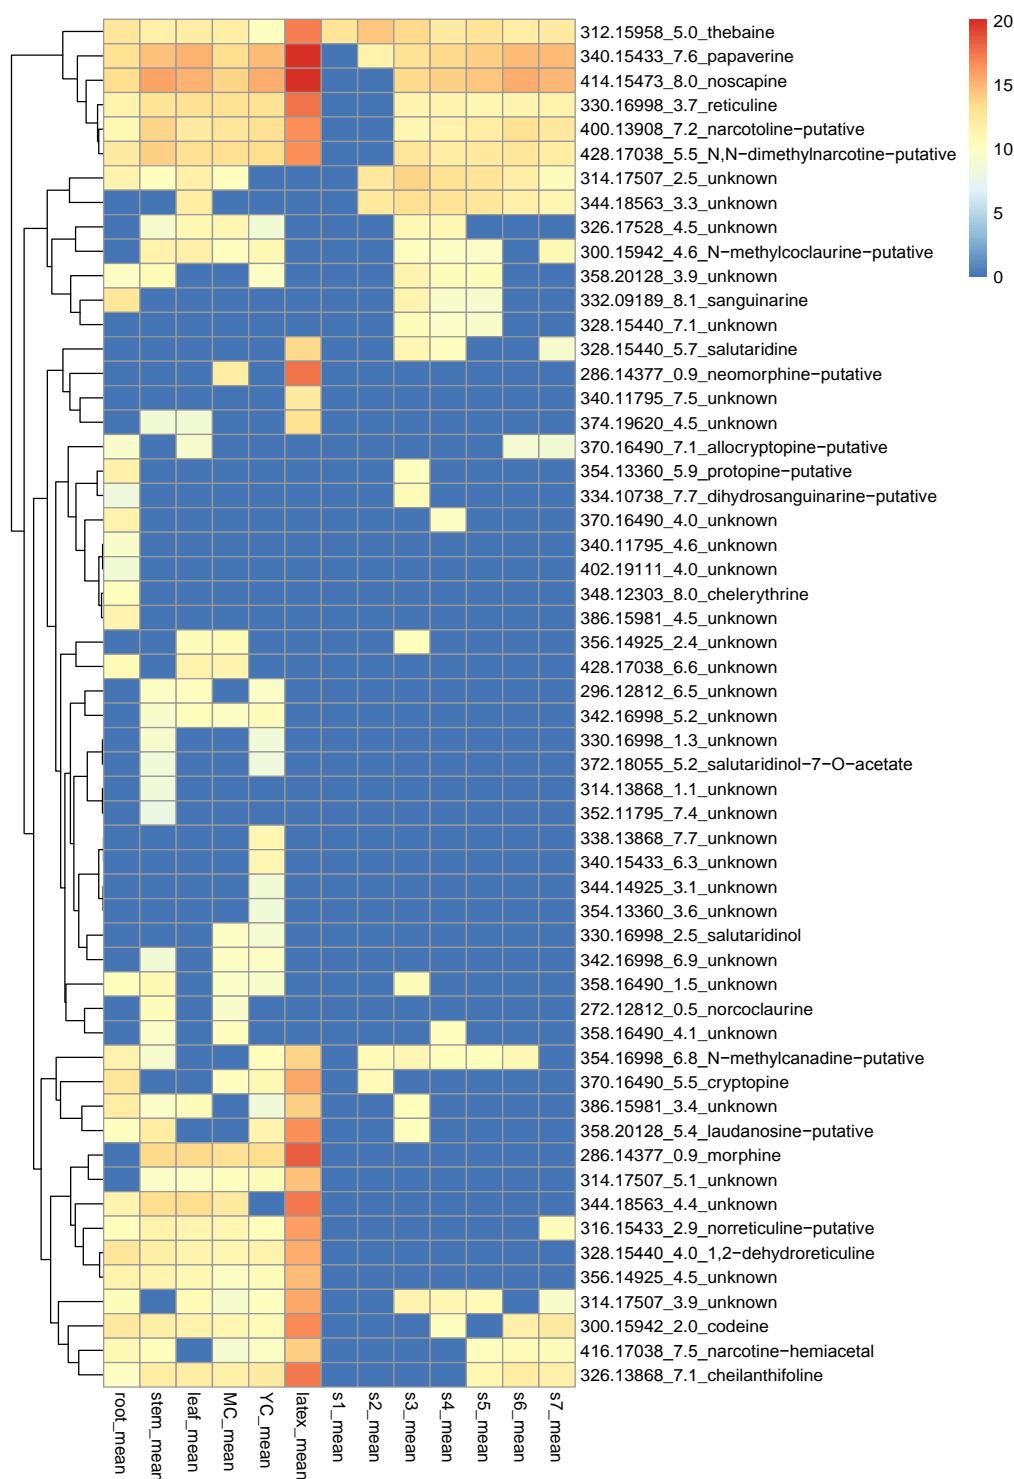

**Supplementary Figure 14. Heatmap of all known and unknown alkaloid abundances from six tissues and seven developmental stages quantified from Orbitrap analysis.** The heatmap colours range from 0 (blue) to 20 (red) of log1p[alkaloid content]. Source data are provided as a Source Data file.

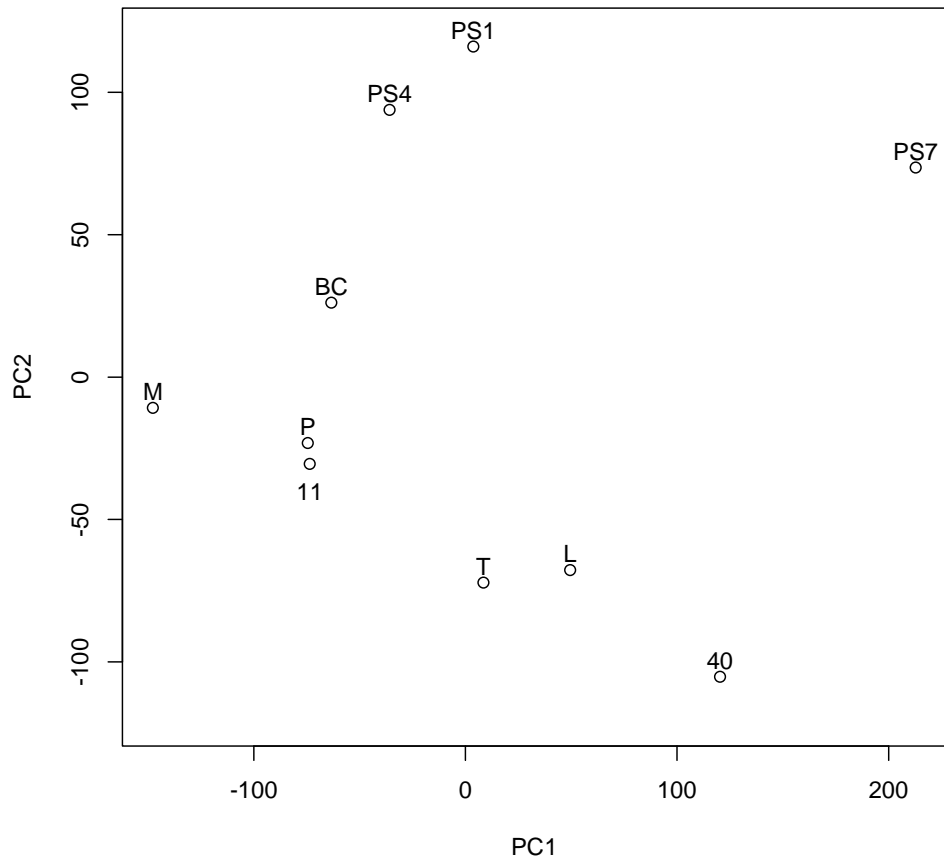

**Supplementary Figure 15. Principal components analysis of copy number variation in the non-BIA genes identifies genome-wide similarity among cultivars.** Analysis was run on 62,086 CNVs identified across the genome from non-BIA genes. Source data are provided as a Source Data file.

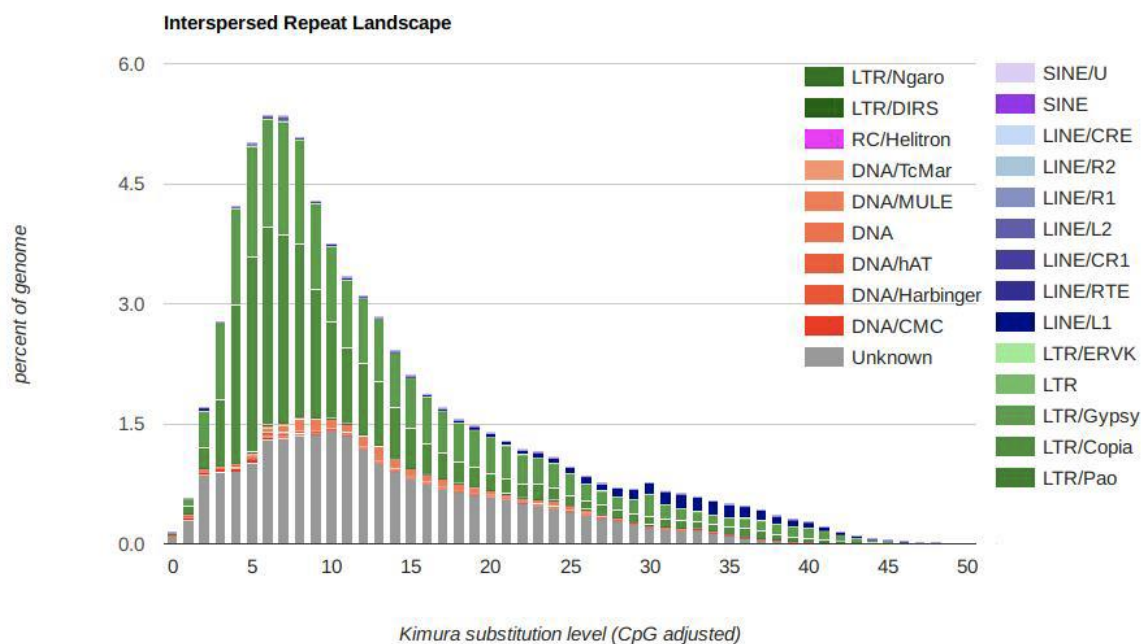

**Supplementary Figure 16. Interspersed repeat landscape ordered by the Kimura substitution levels.** Kimura distance provides an estimation of the age of the element insertion. Source data are provided as a Source Data file.

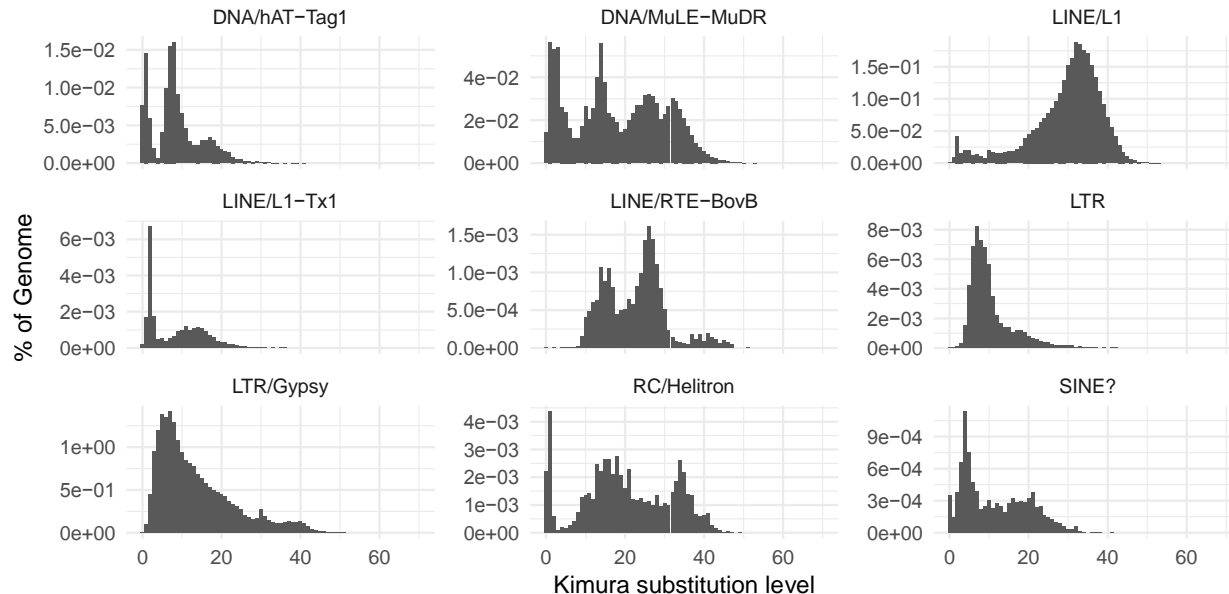

**Supplementary Figure 17. Repeat landscapes for enriched TEs ordered by Kimura substitution level.** Kimura distance provides an estimation of the age of the element insertion for the main TE classes identified as being enriched within at least on cluster (from Supplementary Table 10. Source data are provided as a Source Data file.

**Supplementary Table 1. Improved assembly and annotation statistics of the opium poppy genome.**

|                                                                  |         |
|------------------------------------------------------------------|---------|
| Number of contigs before Hi-C scaffolding                        | 35732   |
| Length of contig N50                                             | 7.6 Mb  |
| Number of contig N50                                             | 104     |
| Number of chromosome-scale scaffolds (cScaffs)                   | 11      |
| Assembly size of cScaffs                                         | 2.64 Gb |
| Number of all protein-coding genes (projected from Guo assembly) | 63191   |

**Supplementary Table 2. Statistics of the mapping results against the two genome assemblies with the Mate-Pair reads from 7-10kb jumping libraries of PS7 and HN1.**

| Source of the Mate-pair reads | Mapping                                              | Guo (chr1-chr11) | Hi-C (chr1-chr11) | Guo_whole genome | Hi-C_whole genome |
|-------------------------------|------------------------------------------------------|------------------|-------------------|------------------|-------------------|
| PS7 (~15x)                    | Properly paired                                      | 75.41%           | 85.18%            | 85.63%           | 85.60%            |
|                               | With mate mapped to a different chromosome (mapQ>=5) | 22991485         | 15652115          | 16053586         | 15619706          |
| HN1 (~34.0x)                  | Properly paired                                      | 74.55%           | 85.05%            | 85.71%           | 85.67%            |
|                               | With mate mapped to a different chromosome (mapQ>=5) | 35676132         | 20268043          | 19650015         | 19154152          |

**Supplementary Table 3. Mapping of PacBio reads across scaffold bridges in both genome assemblies.**

|                                   | PS7 to Guo | HN1 to Guo | Both to Guo | PS7 to Hi-C | HN1 to Hi-C | Both to Hi-C |
|-----------------------------------|------------|------------|-------------|-------------|-------------|--------------|
| Total number of gaps              | 879        | 879        | 879         | 768         | 768         | 768          |
| Number of gaps with reads mapping | 38         | 45         | 34          | 185         | 199         | 146          |
| Proportion of gaps                | 4.3%       | 5.1%       | 3.9%        | 24.1%       | 25.9%       | 19.0%        |

Note: Table shows the number of scaffold breaks in the Guo *et al.*<sup>2</sup> genome and the Hi-C assembly with at least one high-confidence PacBio read mapping across the gap, using libraries from PS7 and HN1 accessions (both > 10x coverage). Source data are provided as a Source Data file.

**Supplementary Table 4. The effect of maximum distance to the nearest BIA gene neighbor on the amount of clustering in BIA genes.**

| Maximum distance to nearest neighbor (Mbp) | Number of genes in all clusters | Proportion of BIA genes in clusters | Number of clusters | Total size of all clusters (Mbp) | Proportion of genome occurring within clusters | <i>p</i> -value for global clustering test | <i>p</i> -value for incremental clustering test |
|--------------------------------------------|---------------------------------|-------------------------------------|--------------------|----------------------------------|------------------------------------------------|--------------------------------------------|-------------------------------------------------|
| 0.001                                      | 0                               | 0.00                                | 0                  | 0.0000                           | 0.0000                                         | NA                                         | NA                                              |
| 0.0025                                     | 7                               | 0.06                                | 2                  | 0.0147                           | 0.0000                                         | 0                                          | NA                                              |
| 0.005                                      | 9                               | 0.08                                | 3                  | 0.0196                           | 0.0000                                         | 0                                          | 0                                               |
| 0.0075                                     | 14                              | 0.13                                | 5                  | 0.0428                           | 0.0000                                         | 0                                          | NA                                              |
| 0.01                                       | 27                              | 0.25                                | 10                 | 0.1241                           | 0.0000                                         | 0                                          | 0                                               |
| 0.02                                       | 40                              | 0.37                                | 15                 | 0.2420                           | 0.0001                                         | 0                                          | NA                                              |
| 0.03                                       | 59                              | 0.54                                | 19                 | 0.5964                           | 0.0002                                         | 0                                          | NA                                              |
| 0.04                                       | 62                              | 0.57                                | 19                 | 0.7037                           | 0.0003                                         | 0                                          | NA                                              |
| 0.05                                       | 66                              | 0.61                                | 18                 | 0.9254                           | 0.0004                                         | 0                                          | 0                                               |
| 0.075                                      | 69                              | 0.63                                | 16                 | 1.2319                           | 0.0005                                         | 0                                          | NA                                              |
| 0.1                                        | 76                              | 0.70                                | 17                 | 1.7489                           | 0.0007                                         | 0                                          | 0                                               |
| 0.2                                        | 81                              | 0.74                                | 17                 | 2.4542                           | 0.0009                                         | 0                                          | NA                                              |
| 0.5                                        | 85                              | 0.78                                | 18                 | 3.2656                           | 0.0012                                         | 0                                          | 0                                               |
| 1                                          | 87                              | 0.80                                | 18                 | 4.7634                           | 0.0018                                         | 0                                          | 0.4284                                          |
| 5                                          | 93                              | 0.85                                | 19                 | 16.1685                          | 0.0061                                         | 0                                          | 0.1829                                          |
| 10                                         | 97                              | 0.89                                | 17                 | 59.4910                          | 0.0226                                         | 0                                          | 0.5556                                          |
| 20                                         | 99                              | 0.91                                | 14                 | 121.1587                         | 0.0459                                         | 0.052                                      | NA                                              |
| 50                                         | 104                             | 0.95                                | 11                 | 351.7468                         | 0.1334                                         | 0.7449                                     | 0.6931                                          |
| 100                                        | 108                             | 0.99                                | 10                 | 816.1021                         | 0.3094                                         | 0.6254                                     | 0.8256                                          |

Note: The proportion of total genome size is calculated relative to the size of the 11 cScaffs in the assembly. *P*-values are not corrected for multiple comparisons, and are for one-sided tests of the significance of observed clustering based on two approaches: the global approach randomizes gene locations and tests whether significantly more clustering is observed than under randomness at different thresholds; the incremental approach begins with the baseline clustering, randomizes the locations of remaining non-clustered genes, and tests whether significantly more clustering is observed under randomness for each additional distance (see Methods).

**Supplementary Table 5. Effect of window size on clustering of BIA genes.**

| Maximum distance to nearest neighbor (Mbp) | Number of genes in all clusters | Proportion of BIA genes in clusters | Number of clusters | Total size of all clusters (Mbp) | Proportion of genome occurring within clusters | <i>p</i> -value for global clustering test | <i>p</i> -value for incremental clustering test |
|--------------------------------------------|---------------------------------|-------------------------------------|--------------------|----------------------------------|------------------------------------------------|--------------------------------------------|-------------------------------------------------|
| 0.001                                      | 0                               | 0.00                                | 0                  | 0.0000                           | 0.0000                                         | NA                                         | NA                                              |
| 0.0025                                     | 2                               | 0.03                                | 1                  | 0.0054                           | 0.0000                                         | 0.0087                                     | NA                                              |
| 0.005                                      | 4                               | 0.05                                | 2                  | 0.0104                           | 0.0000                                         | 0.0006                                     | 0                                               |
| 0.0075                                     | 6                               | 0.08                                | 3                  | 0.0198                           | 0.0000                                         | 0                                          | NA                                              |
| 0.01                                       | 9                               | 0.12                                | 4                  | 0.0418                           | 0.0000                                         | 0                                          | 0.0003                                          |
| 0.02                                       | 14                              | 0.18                                | 5                  | 0.0896                           | 0.0000                                         | 0                                          | NA                                              |
| 0.03                                       | 21                              | 0.27                                | 7                  | 0.2125                           | 0.0001                                         | 0                                          | NA                                              |
| 0.04                                       | 24                              | 0.31                                | 8                  | 0.2818                           | 0.0001                                         | 0                                          | NA                                              |
| 0.05                                       | 28                              | 0.36                                | 9                  | 0.4159                           | 0.0002                                         | 0                                          | 0                                               |
| 0.075                                      | 30                              | 0.39                                | 7                  | 0.6512                           | 0.0002                                         | 0                                          | NA                                              |
| 0.1                                        | 38                              | 0.49                                | 10                 | 1.0732                           | 0.0004                                         | 0                                          | 0                                               |
| 0.2                                        | 43                              | 0.56                                | 11                 | 1.6384                           | 0.0006                                         | 0                                          | NA                                              |
| 0.5                                        | 48                              | 0.62                                | 12                 | 2.7307                           | 0.0010                                         | 0                                          | 0.0002                                          |
| 1                                          | 50                              | 0.65                                | 12                 | 4.2286                           | 0.0016                                         | 0                                          | 0.46                                            |
| 5                                          | 56                              | 0.73                                | 14                 | 14.4601                          | 0.0055                                         | 0                                          | 0.3535                                          |
| 10                                         | 64                              | 0.83                                | 16                 | 57.9647                          | 0.0220                                         | 0                                          | 0.2155                                          |
| 20                                         | 67                              | 0.87                                | 14                 | 119.6339                         | 0.0454                                         | 0.0002                                     | NA                                              |
| 50                                         | 72                              | 0.94                                | 11                 | 350.2428                         | 0.1328                                         | 0.3124                                     | 0.6711                                          |
| 100                                        | 76                              | 0.99                                | 10                 | 814.9016                         | 0.3089                                         | 0.4389                                     | 0.8284                                          |

Note: Statistics are shown for number of clusters and the inclusion of BIA genes when putative tandem duplicates are removed (all tests as per Supplementary Table 4).

**Supplementary Table 6. Effect of spatial scale of analysis on clustering of BIA genes.**

|                 | Number of genes in cluster | Clustering distance |        |        |        |        |        |        |        |        |
|-----------------|----------------------------|---------------------|--------|--------|--------|--------|--------|--------|--------|--------|
|                 |                            | 0.1                 | 0.2    | 0.5    | 1      | 5      | 10     | 20     | 50     | 100    |
| dopamine_4HPAA  | 5                          | 0.00                | 0.00   | 0.00   | 0.00   | 0.00   | 0.40   | 0.40   | 0.60   | 1.00   |
| morphine        | 4                          | 0.00                | 0.00   | 0.00   | 0.25   | 0.50   | 1.00   | 1.00   | 1.00   | 1.00   |
| noscaphine      | 13                         | 0.85                | 0.85   | 0.85   | 0.85   | 0.92   | 0.92   | 1.00   | 1.00   | 1.00   |
| papaverine      | 5                          | 0.40                | 0.40   | 0.40   | 0.40   | 0.60   | 0.60   | 0.60   | 1.00   | 1.00   |
| reticuline      | 8                          | 0.00                | 0.00   | 0.50   | 0.50   | 0.88   | 0.88   | 0.88   | 1.00   | 1.00   |
| sanguinarine    | 13                         | 0.31                | 0.46   | 0.46   | 0.46   | 0.54   | 0.62   | 0.69   | 0.85   | 0.92   |
| thebaine        | 9                          | 0.89                | 1.00   | 1.00   | 1.00   | 1.00   | 1.00   | 1.00   | 1.00   | 1.00   |
| unknown         | 22                         | 0.59                | 0.68   | 0.73   | 0.77   | 0.77   | 0.91   | 0.95   | 0.95   | 1.00   |
| <i>p</i> -value |                            | 0.0005              | 0.0005 | 0.0005 | 0.0010 | 0.0005 | 0.0380 | 0.0185 | 0.0620 | 0.0005 |

Note: Table shows the proportion of genes in each pathway that are clustered with any other BIA gene, based on clustering distance. Bottom row shows the  $p$ -values for the  $\chi^2$  test of significance at each clustering distance.

**Supplementary Table 7. Effect of spatial scale of analysis on clustering of BIA genes by pathway.**

|                 | Number of genes in cluster | Clustering distance |        |        |        |        |        |        |        |        |
|-----------------|----------------------------|---------------------|--------|--------|--------|--------|--------|--------|--------|--------|
|                 |                            | 0.1                 | 0.2    | 0.5    | 1      | 5      | 10     | 20     | 50     | 100    |
| dopamine_4HPAA  | 5                          | 0.00                | 0.00   | 0.00   | 0.00   | 0.00   | 0.00   | 0.00   | 0.00   | 0.40   |
| morphine        | 4                          | 0.00                | 0.00   | 0.00   | 0.00   | 0.00   | 0.00   | 0.00   | 0.00   | 0.00   |
| noscaphine      | 13                         | 0.85                | 0.85   | 0.85   | 0.85   | 0.85   | 0.85   | 0.85   | 0.85   | 0.85   |
| papaverine      | 5                          | 0.40                | 0.40   | 0.40   | 0.40   | 0.40   | 0.40   | 0.40   | 0.40   | 0.40   |
| reticuline      | 8                          | 0.00                | 0.00   | 0.50   | 0.50   | 0.75   | 0.75   | 0.75   | 0.75   | 0.75   |
| sanguinarine    | 13                         | 0.15                | 0.31   | 0.31   | 0.31   | 0.31   | 0.31   | 0.31   | 0.62   | 0.69   |
| thebaine        | 9                          | 0.89                | 0.89   | 0.89   | 0.89   | 0.89   | 0.89   | 0.89   | 0.89   | 0.89   |
| unknown         | 22                         | 0.59                | 0.68   | 0.73   | 0.77   | 0.77   | 0.82   | 0.82   | 0.86   | 0.91   |
| <i>p</i> -value |                            | 0.0005              | 0.0005 | 0.0010 | 0.0010 | 0.0005 | 0.0005 | 0.0005 | 0.0020 | 0.0120 |

Note: Table shows the proportion of genes in each pathway that are clustered with other genes in the same pathway, based on clustering distance. Bottom row shows the  $p$ -values for the  $\chi^2$  test of significance at each clustering distance.

**Supplementary Table 8. Summary of re-sequencing on 10 opium poppy cultivars.**

| Chemotype | Estimated genome size (Gb) | Coverage | Other name   |
|-----------|----------------------------|----------|--------------|
| PS7       | 2.84                       | 26.11    | Roxanne      |
| T         | 3.06                       | 16.81    | -            |
| M         | 3.05                       | 18.53    | Marianne     |
| BC        | 3.06                       | 19.77    | Bea's choice |
| L         | 3.00                       | 20.22    | Louisiana    |
| PS1       | 2.96                       | 21.95    | Natasha      |
| PS4       | 2.96                       | 22.46    | Veronica     |
| 11        | 3.12                       | 21.66    | -            |
| 40        | 3.09                       | 23.30    | -            |
| P         | 3.04                       | 25.80    | Przemko      |
| average   | 3.02                       |          |              |

**Supplementary Table 9. CNVs enrichment for pathway genes in clusters relative to isolated pathway genes.**

| Clustering distance (Mb) | Number of genes in clusters | Number of genes not in clusters | Proportion of genes in cluster with CNV | Proportion of genes not in cluster with CNV | <i>p</i> -value | <i>p</i> -value with noscopine cluster excluded |
|--------------------------|-----------------------------|---------------------------------|-----------------------------------------|---------------------------------------------|-----------------|-------------------------------------------------|
| 0.1                      | 76                          | 33                              | 0.711                                   | 0.273                                       | 0.000021        | 0.000268                                        |
| 0.2                      | 81                          | 28                              | 0.679                                   | 0.286                                       | 0.000281        | 0.002124                                        |
| 0.5                      | 85                          | 24                              | 0.659                                   | 0.292                                       | 0.001299        | 0.006949                                        |
| 1                        | 87                          | 22                              | 0.667                                   | 0.227                                       | 0.000193        | 0.001206                                        |
| 5                        | 93                          | 16                              | 0.634                                   | 0.250                                       | 0.00403         | 0.013941                                        |
| 10                       | 97                          | 12                              | 0.629                                   | 0.167                                       | 0.002227        | 0.007003                                        |

Note: The *p*-value is for a  $\chi^2$  test for CNVs in pathway genes in clusters compared isolated pathway genes.

**Supplementary Table 10. Enrichment of transposable elements in clusters.**

| Name of TE    | Scaffold | Cluster start | Cluster stop | <i>p</i> -value | # of TEs | Bonferroni-adjusted cutoff | Genes or pathways involved |
|---------------|----------|---------------|--------------|-----------------|----------|----------------------------|----------------------------|
| LINE/L1       | cScaf1   | 149912189     | 149998809    | 0.0020          | 24       | 0.0100                     | T6ODM                      |
| DNA/hAT-Tag1  | cScaf1   | 149912189     | 149998809    | 0.0001          | 12       | 0.0100                     | T6ODM                      |
| SINE          | cScaf1   | 149912189     | 149998809    | 0.0011          | 3        | 0.0100                     | T6ODM                      |
| LTR/Gypsy     | cScaf4   | 1245660       | 1390104      | 0.0120          | 50       | 0.0125                     | PR10 genes                 |
| LINE/RTE-BovB | cScaf4   | 37313304      | 37633765     | 0.0032          | 3        | 0.0083                     | 6OMT, CYP80B1              |
| RC/Helitron   | cScaf4   | 53401724      | 53706630     | 0.0002          | 17       | 0.0063                     | TyrDC1                     |
| LINE/L1       | cScaf4   | 53401724      | 53706630     | 0.0017          | 51       | 0.0063                     | TyrDC1                     |
| LINE/L1-Tx1   | cScaf5   | 223293068     | 223555031    | 0.0019          | 3        | 0.0063                     | 6OMT, CYP80B1              |
| LTR           | cScaf7   | 1513969       | 1578993      | 0.0085          | 3        | 0.0125                     | Thebaine cluster           |
| DNA/hAT-Tag1  | cScaf7   | 1513969       | 1578993      | 0.0070          | 3        | 0.0125                     | Thebaine cluster           |
| DNA/MuLE-MuDR | cScaf8   | 197013213     | 197023633    | 0.0143          | 5        | 0.0250                     | COR                        |

Note: Tests are conducted for clusters showing significant enrichment of one or more transposable elements (TEs) at copy number  $\geq 3$ , after Bonferroni correction for multiple comparisons, and *p*-values shown are for a one-sided test. Relationship between cScafs and *P. somniferum* chromosomes as defined by Guo *et al.*<sup>2</sup> is shown in Supplementary Table 12.

**Supplementary Table 11. Mean age of all TEs in each cluster and *p*-value from T-test of significance.**

| cScaffold | Cluster start | Cluster stop | Number of TEs | <i>p</i> -value | Mean age in cluster |
|-----------|---------------|--------------|---------------|-----------------|---------------------|
| cScaf1    | 149912189     | 149998809    | 114           | 0.3106          | 17.5                |
| cScaf1    | 155761464     | 155906984    | 116           | 0.0012          | 19.7                |
| cScaf1    | 296685802     | 296775816    | 110           | 0.1430          | 18.0                |
| cScaf11   | 2268808       | 2932559      | 624           | 0.4560          | 16.9                |
| cScaf3    | 290603899     | 290697657    | 106           | 0.1332          | 17.8                |
| cScaf4    | 1245660       | 1390104      | 155           | 0.0001          | 19.7                |
| cScaf4    | 30930417      | 30937119     | 8             | 0.4504          | 19.5                |
| cScaf4    | 37313304      | 37633765     | 257           | 0.2711          | 17.3                |
| cScaf4    | 47639429      | 47726604     | 77            | 0.0330          | 19.3                |
| cScaf4    | 53401724      | 53706630     | 268           | 0.0004          | 19.0                |
| cScaf5    | 223293068     | 223555031    | 237           | 0.4236          | 17.1                |
| cScaf5    | 239431287     | 239458931    | 25            | 0.0069          | 21.8                |
| cScaf5    | 250291029     | 250333482    | 44            | 0.0751          | 19.4                |
| cScaf6    | 22116151      | 22685996     | 522           | 0.0001          | 18.5                |
| cScaf7    | 1513969       | 1578993      | 86            | 0.0086          | 19.3                |
| cScaf8    | 140581640     | 140604055    | 27            | 0.1456          | 19.8                |
| cScaf8    | 197013213     | 197023633    | 22            | 0.0513          | 22.0                |
| cScaf10   | 165210099     | 165532548    | 236           | 0.0000          | 19.5                |

Note: *p*-values shown are for a two-sided test. Genome-wide TEs have a mean age of 16.6. Relationship between cScafs and *P. somniferum* chromosomes as defined by Guo *et al.*<sup>2</sup> is shown in Supplementary Table 12.

**Supplementary Table 12. The relationship between cScaf number and Guo *et al.*<sup>2</sup> chromosome number.**

| Guo <i>et al.</i> <sup>2</sup> chromosome number | Hi-C cScaf number | Guo <i>et al.</i> <sup>2</sup> scaffold name |
|--------------------------------------------------|-------------------|----------------------------------------------|
| 2                                                | 1                 | NC_039359.1                                  |
| 3                                                | 2                 | NC_039360.1                                  |
| 7                                                | 3                 | NC_039364.1                                  |
| 1                                                | 4                 | NC_039358.1                                  |
| 5                                                | 5                 | NC_039362.1                                  |
| 9                                                | 6                 | NC_039366.1                                  |
| 8                                                | 7                 | NC_039365.1                                  |
| 10                                               | 8                 | NC_039367.1                                  |
| 6                                                | 9                 | NC_039363.1                                  |
| 11                                               | 10                | NC_039368.1                                  |
| 4                                                | 11                | NC_039361.1                                  |

## Supplementary References

1. Li, H. Minimap2: pairwise alignment for nucleotide sequences. *Bioinformatics* **34**, 3094–3100 (2018).
2. Guo, L. *et al.* The opium poppy genome and morphinan production. *Science* **362**, 343–347 (2018).
3. Song, B. *et al.* Complement genome annotation lift over using a weighted sequence alignment strategy. *Front. Genet.* doi: 10.3389/fgene.2019.01046 (2019).
